# Supplementary material for: Examining the short-term anxiolytic and antidepressant effect of Floatation-REST
Source: PLoS One. 2018 Feb 2;13(2):e0190292. doi: 10.1371/journal.pone.0190292 (PMC5796691; doi:10.1371/journal.pone.0190292)
Supplement: S1 Data — (XLSX) [file pone.0190292.s010.xlsx]

## Sheet: AA
record_id	Event	Age	Sex	Years of Education	BMI	Severe Subgroup	MINI_MDD	MINI_GAD	MINI_Panic	MINI_Agoraphobia	MINI_Social Phobia	MINI_PTSD	Psychotropic Medication	total_time_in_float_pool	total_time_in_dark	STAI_raw_score	STAI Change Score	STAI POMP	STAI Change Score POMP	asi3r_score	oasis_score	phq_score	sds_score	hm_1	Net - Time Happiness	PSS Score	ksspre_sleepiness	Sleepiness Change Score	Sleepiness POMP	Sleepiness POMP Change	Pain scale	Pain Change	Pain POMP	Pain POMP Change	panasx_NA_score	Negative Affect Change Score	Negative Affect POMP	Negative Affect POMP Change	panasx_PA_score	Positive Affect Change Score	Positive Affect POMP	Positive Affect POMP Change	panasx_Happiness_score	Happiness Change Score	Happiness POMP	Happiness POMP Change	panasx_fatigue_score	Fatigue Change Score	Fatigue POMP
						0 = no, 1 = yes	0 = no, 1 = yes	0 = no, 1 = yes	0 = no, 1 = yes	0 = no, 1 = yes	0 = no, 1 = yes	0 = no, 1 = yes	0 = no, 1 = yes				(Post - Pre)		(Post - Pre)					Average Happiness	Net - Time Happiness			(Post - Pre)	KSS	(Post - Pre)	Wong-Baker	(Post - Pre)		(Post - Pre)	negative affect	(Post - Pre)		(Post - Pre)	positive affect	(Post - Pre)		(Post - Pre)	Joviality	(Post - Pre)		(Post - Pre)		(Post - Pre)
1	Baseline	51	Male	13	30.7	0	1	0	0	1	0	0	0	60	10.2		-9		-15	20	8	10	8	6	20	24		-4		-50						-1		-2.5		5		12.5		6		18.75		-5
1	Pre-Float 1	51	Male	13	30.7	0	1	0	0	1	0	0	0	60	10.2	42		36.6667		20	8	10	8	6	20	24	7		75						12		5		25		37.5		18		31.25		14		62.5
1	Post-Float 1	51	Male	13	30.7	0	1	0	0	1	0	0	0	60	10.2	33		21.6667		20	8	10	8	6	20	24	3		25						11		2.5		30		50		24		50		9		31.25
2	Baseline	55	Female	13	35.3	0	1	0	0	0	0	1	0	60	55		-6		-10	20	7	9	15	6	15	26		2		25		-3		-30		-3		-7.5		-4		-10		-2		-6.25		0
2	Pre-Float 1	55	Female	13	35.3	0	1	0	0	0	0	1	0	60	55	36		26.6667		20	7	9	15	6	15	26	4		37.5		5		50		13		7.5		24		35		21		40.625		8		25
2	Post-Float 1	55	Female	13	35.3	0	1	0	0	0	0	1	0	60	55	30		16.6667		20	7	9	15	6	15	26	6		62.5		2		20		10		0		20		25		19		34.375		8		25
3	Baseline	34	Female	13	22.3	1	1	1	0	0	1	1	1	60	59		-15		-25	43	16	16	27	3	-30	38		-2		-25		-1		-10		-10		-25		16		40		14		43.75		-3
3	Pre-Float 1	34	Female	13	22.3	1	1	1	0	0	1	1	1	60	59	52		53.3333		43	16	16	27	3	-30	38	5		50		1		10		21		27.5		15		12.5		10		6.25		11		43.75
3	Post-Float 1	34	Female	13	22.3	1	1	1	0	0	1	1	1	60	59	37		28.3333		43	16	16	27	3	-30	38	3		25		0		0		11		2.5		31		52.5		24		50		8		25
3.5	Baseline	42	Female	16	26.6	0	0	1	0	0	0	0	1	60	0		-13		-21.6667	19	9	9	6	8	25	16		0		0		-3		-30		-11		-27.5		1		2.5		3		9.375		-3
3.8	Pre-Float 1	42	Female	16	26.6	0	0	1	0	0	0	0	1	60	0	38		30		19	9	9	6	8	25	16	3		25		4		40		23		32.5		44		85		31		71.875		9		31.25
4.1	Post-Float 1	42	Female	16	26.6	0	0	1	0	0	0	0	1	60	0	25		8.33333		19	9	9	6	8	25	16	3		25		1		10		12		5		45		87.5		34		81.25		6		12.5
5	Baseline	21	Female	13	24	0	1	0	0	0	1	0	0	60	55		-9		-15	10	7	3	15	4	0	23		-2		-25		-1		-10		-1		-2.5		2		5		2		6.25		-2
4.7	Pre-Float 1	21	Female	13	24	0	1	0	0	0	1	0	0	60	55	41		35		10	7	3	15	4	0	23	6		62.5		2		20		11		2.5		29		47.5		22		43.75		10		37.5
5	Post-Float 1	21	Female	13	24	0	1	0	0	0	1	0	0	60	55	32		20		10	7	3	15	4	0	23	4		37.5		1		10		10		0		31		52.5		24		50		8		25
6	Baseline	36	Female	14	33.6	0	1	1	0	0	0	0	1	60	56		-25		-41.6667	29	4	10	2	4	-20	23		-3		-37.5		0		0		-8		-20		-5		-12.5		-3		-9.375		4
5.6	Pre-Float 1	36	Female	14	33.6	0	1	1	0	0	0	0	1	60	56	54		56.6667		29	4	10	2	4	-20	23	7		75		0		0		18		20		18		20		13		15.625		10		37.5
5.9	Post-Float 1	36	Female	14	33.6	0	1	1	0	0	0	0	1	60	56	29		15		29	4	10	2	4	-20	23	4		37.5		0		0		10		0		13		7.5		10		6.25		14		62.5
7	Baseline	56	Male	18	25	0	1	1	0	0	0	0	0	60	53		-13		-21.6667	9	10	11	12	2	-15	23		-3		-37.5		0		0		-5		-12.5		8		20		10		31.25		-7
6.5	Pre-Float 1	56	Male	18	25	0	1	1	0	0	0	0	0	60	53	39		31.6667		9	10	11	12	2	-15	23	6		62.5		1		10		15		12.5		17		17.5		10		6.25		12		50
6.8	Post-Float 1	56	Male	18	25	0	1	1	0	0	0	0	0	60	53	26		10		9	10	11	12	2	-15	23	3		25		1		10		10		0		25		37.5		20		37.5		5		6.25
8	Baseline	48	Female	13	28.9	0	1	1	1	1	1	0	0	60	3.4		-18		-30	17	9	15	12	5	-30	32		0		0		-1		-10		-3		-7.5		11		27.5		12		37.5		0
8	Pre-Float 1	48	Female	13	28.9	0	1	1	1	1	1	0	0	60	3.4	41		35		17	9	15	12	5	-30	32	3		25		2		20		13		7.5		15		12.5		10		6.25		8		25
7.7	Post-Float 1	48	Female	13	28.9	0	1	1	1	1	1	0	0	60	3.4	23		5		17	9	15	12	5	-30	32	3		25		1		10		10		0		26		40		22		43.75		8		25
9	Baseline	38	Female	11	29.8	1	1	0	1	0	0	1	0	60	0		-19		-31.6667	50	16	21	21	0	-60	37		-2		-25		-5		-50		0		0		19		47.5		22		68.75		-4
9	Pre-Float 1	38	Female	11	29.8	1	1	0	1	0	0	1	0	60	0	44		40		50	16	21	21	0	-60	37	5		50		8		80		11		2.5		23		32.5		12		12.5		9		31.25
8.6	Post-Float 1	38	Female	11	29.8	1	1	0	1	0	0	1	0	60	0	25		8.33333		50	16	21	21	0	-60	37	3		25		3		30		11		2.5		42		80		34		81.25		5		6.25
10	Baseline	30	Male	16	28.5	1	1	0	0	1	0	0	1	60	8.3		-13		-21.6667	33	8	12	19	4	-20	26		-2		-25		-1		-10		-5		-12.5		15		37.5		16		50		-3
10	Pre-Float 1	30	Male	16	28.5	1	1	0	0	1	0	0	1	60	8.3	41		35		33	8	12	19	4	-20	26	4		37.5		1		10		18		20		18		20		11		9.375		11		43.75
9.5	Post-Float 1	30	Male	16	28.5	1	1	0	0	1	0	0	1	60	8.3	28		13.3333		33	8	12	19	4	-20	26	2		12.5		0		0		13		7.5		33		57.5		27		59.375		8		25
11	Baseline	37	Male	13	34.5	0	1	0	0	0	0	1	1	60	4.5		-10		-16.6667	22	13	17	23	3	0	30		1		12.5		-1		-10		0		0		4		10		9		28.125		-3
11	Pre-Float 1	37	Male	13	34.5	0	1	0	0	0	0	1	1	60	4.5	35		25		22	13	17	23	3	0	30	4		37.5		3		30		11		2.5		25		37.5		15		21.875		8		25
11	Post-Float 1	37	Male	13	34.5	0	1	0	0	0	0	1	1	60	4.5	25		8.33333		22	13	17	23	3	0	30	5		50		2		20		11		2.5		29		47.5		24		50		5		6.25
12	Baseline	39	Male	16	35.4	0	1	1	0	0	0	0	0	60	51.1		-13		-21.6667	49	1	1	0	7	20	17		0		0		0		0		1		2.5		11		27.5		8		25		0
12	Pre-Float 1	39	Male	16	35.4	0	1	1	0	0	0	0	0	60	51.1	44		40		49	1	1	0	7	20	17	3		25		0		0		10		0		24		35		18		31.25		7		18.75
12	Post-Float 1	39	Male	16	35.4	0	1	1	0	0	0	0	0	60	51.1	31		18.3333		49	1	1	0	7	20	17	3		25		0		0		11		2.5		35		62.5		26		56.25		7		18.75
13	Baseline	35	Female	18	23	0	1	1	0	0	0	0	1	60	53.5		-17		-28.3333	21	9	7	11	6	30	19		3		37.5		-1		-10		-2		-5		-1		-2.5		5		15.625		4
13	Pre-Float 1	35	Female	18	23	0	1	1	0	0	0	0	1	60	53.5	41		35		21	9	7	11	6	30	19	3		25		1		10		15		12.5		31		52.5		22		43.75		4		0
13	Post-Float 1	35	Female	18	23	0	1	1	0	0	0	0	1	60	53.5	24		6.66667		21	9	7	11	6	30	19	6		62.5		0		0		13		7.5		30		50		27		59.375		8		25
14	Baseline	25	Male	12	29.8	0	1	1	1	1	1	1	1	60	16		-20		-33.3333	11	7	6	11	8	20	26		-2		-25		-1		-10		-8		-20		0		0		-1		-3.125		-4
14	Pre-Float 1	25	Male	12	29.8	0	1	1	1	1	1	1	1	60	16	46		43.3333		11	7	6	11	8	20	26	6		37.5		4		40		21		27.5		36		65		30		68.75		8		25
14	Post-Float 1	25	Male	12	29.8	0	1	1	1	1	1	1	1	60	16	26		10		11	7	6	11	8	20	26	2		12.5		3		30		13		7.5		36		65		29		65.625		4		0
15	Baseline	53	Female	12	34.5	0	1	0	0	1	0	0	1	60	0.5		-7		-11.6667	24	10	10	17	5	0	21		-2		-25		-1		-10		3		7.5		5		12.5		1		3.125		-3
15	Pre-Float 1	53	Female	12	34.5	0	1	0	0	1	0	0	1	60	0.5	35		25		24	10	10	17	5	0	21	3		25		5		50		11		2.5		30		50		24		50		8		25
15	Post-Float 1	53	Female	12	34.5	0	1	0	0	1	0	0	1	60	0.5	28		13.3333		24	10	10	17	5	0	21	1		0		4		40		14		10		35		62.5		25		53.125		5		6.25
16	Baseline	21	Female	12	35.8	1	1	0	0	0	0	1	0	60	0		-19		-31.6667	42	15	20	27	0		40		-1		-12.5		-6		-60		-14		-35		-7		-17.5		3		9.375		-8
16	Pre-Float 1	21	Female	12	35.8	1	1	0	0	0	0	1	0	60	0	50		50		42	15	20	27	0		40	8		87.5		6		60		24		35		20		25		8		0		19		93.75
16	Post-Float 1	21	Female	12	35.8	1	1	0	0	0	0	1	0	60	0	31		18.3333		42	15	20	27	0		40	7		75		0		0		10		0		13		7.5		11		9.375		11		43.75
16.5455	Baseline	52	Female	18	28.8	1	1	0	0	0	1	1	1	60	57.5		-22		-36.6667	33	11	12	14	3	-40	29		2		25		-1		-10		-14		-35		2		5		4		12.5		-1
16.8601	Pre-Float 1	52	Female	18	28.8	1	1	0	0	0	1	1	1	60	57.5	60		66.6667		33	11	12	14	3	-40	29	4		37.5		2		20		25		37.5		21		27.5		10		6.25		8		25
17.1748	Post-Float 1	52	Female	18	28.8	1	1	0	0	0	1	1	1	60	57.5	38		30		33	11	12	14	3	-40	29	6		62.5		1		10		11		2.5		23		32.5		14		18.75		7		18.75
18	Baseline	31	Female	16	26.1	0	1	1	0	0	0	0	0	60	0		-25		-41.6667	21	8	7	3	4	60	23		2		25		-2		-20		-8		-20		-2		-5		-3		-9.375		8
17.6904	Pre-Float 1	31	Female	16	26.1	0	1	1	0	0	0	0	0	60	0	46		43.3333		21	8	7	3	4	60	23	5		50		2		20		23		32.5		35		62.5		28		62.5		4		0
17.98	Post-Float 1	31	Female	16	26.1	0	1	1	0	0	0	0	0	60	0	21		1.66667		21	8	7	3	4	60	23	7		75		0		0		15		12.5		33		57.5		25		53.125		12		50
18.8	Baseline	29	Female	13	35.7	0	1	1	1	1	1	0	0	48	33.9		-10		-16.6667	13	8	13	3	5		27		1		12.5		2		20		0		0		-4		-10		-5		-15.625		11
19.1	Pre-Float 1	29	Female	13	35.7	0	1	1	1	1	1	0	0	48	33.9	45		41.6667		13	8	13	3	5		27	4		37.5		1		10		12		5		17		17.5		14		18.75		5		6.25
19.4	Post-Float 1	29	Female	13	35.7	0	1	1	1	1	1	0	0	48	33.9	35		25		13	8	13	3	5		27	5		50		3		30		12		5		13		7.5		9		3.125		16		75
19.7	Baseline	46	Female	16	27.1	1	1	1	1	1	0	0	1	60	58.9		-19		-31.6667	59	13	21	26	2	-30	27		-3		-37.5		-1		-10		-6		-15		10		25		9		28.125		-2
20	Pre-Float 1	46	Female	16	27.1	1	1	1	1	1	0	0	1	60	58.9	40		33.3333		59	13	21	26	2	-30	27	6		62.5		1		10		17		17.5		28		45		23		46.875		7		18.75
20.3	Post-Float 1	46	Female	16	27.1	1	1	1	1	1	0	0	1	60	58.9	21		1.66667		59	13	21	26	2	-30	27	3		25		0		0		11		2.5		38		70		32		75		5		6.25
20.6	Baseline	48	Female	12	28.9	0	1	1	1	0	0	0	0	60	0		-10		-16.6667	14	6	15	10	7	10	27		3		37.5		-2		-20		3		7.5		16		40		17		53.125		6
20.9	Pre-Float 1	48	Female	12	28.9	0	1	1	1	0	0	0	0	60	0	30		16.6667		14	6	15	10	7	10	27	4		37.5		2		20		11		2.5		21		27.5		18		31.25		4		0
21.2	Post-Float 1	48	Female	12	28.9	0	1	1	1	0	0	0	0	60	0	20		0		14	6	15	10	7	10	27	7		75		0		0		14		10		37		67.5		35		84.375		10		37.5
21.5	Baseline	20	Male	12	24.5	1	1	0	0	0	1	1	0	60	54.2		-15		-25	42	9	20	17	3	-40	24		1		12.5		-1		-10		-3		-7.5		-7		-17.5		-4		-12.5		2
21.8	Pre-Float 1	20	Male	12	24.5	1	1	0	0	0	1	1	0	60	54.2	39		31.6667		42	9	20	17	3	-40	24	4		37.5		2		20		14		10		35		62.5		29		65.625		7		18.75
22.1	Post-Float 1	20	Male	12	24.5	1	1	0	0	0	1	1	0	60	54.2	24		6.66667		42	9	20	17	3	-40	24	5		50		1		10		11		2.5		28		45		25		53.125		9		31.25
23	Baseline	53	Female	13	31.1	0	1	0	1	0	0	0	0	60	0		-6		-10	13	13	13	11	4	-10	29		0		0		-3		-30		-7		-17.5		10		25		9		28.125		-4
23	Pre-Float 1	53	Female	13	31.1	0	1	0	1	0	0	0	0	60	0	31		18.3333		13	13	13	11	4	-10	29	3		25		4		40		17		17.5		30		50		23		46.875		9		31.25
23	Post-Float 1	53	Female	13	31.1	0	1	0	1	0	0	0	0	60	0	25		8.33333		13	13	13	11	4	-10	29	3		25		1		10		10		0		40		75		32		75		5		6.25
24	Baseline	40	Male	14	25.8	0	1	1	0	0	1	0	1	60	59.9		-4		-6.66667	25	11	9	13	2	-40	25		-3		-37.5		0		0		-1		-2.5		9		22.5		4		12.5		-3
24	Pre-Float 1	40	Male	14	25.8	0	1	1	0	0	1	0	1	60	59.9	46		43.3333		25	11	9	13	2	-40	25	5		50		0		0		12		5		16		15		14		18.75		7		18.75
24	Post-Float 1	40	Male	14	25.8	0	1	1	0	0	1	0	1	60	59.9	42		36.6667		25	11	9	13	2	-40	25	2		12.5		0		0		11		2.5		25		37.5		18		31.25		4		0
25	Baseline	43	Male	13	29.4	0	0	1	1	0	0	0	1	60	57		-4		-6.66667	21	11	6	11	1	-30	21		-2		-25		0		0		0		0		-5		-12.5		-5		-15.625		-4
25	Pre-Float 1	43	Male	13	29.4	0	0	1	1	0	0	0	1	60	57	44		40		21	11	6	11	1	-30	21	7		75		0		0		11		2.5		23		32.5		16		25		11		43.75
25	Post-Float 1	43	Male	13	29.4	0	0	1	1	0	0	0	1	60	57	40		33.3333		21	11	6	11	1	-30	21	5		50		0		0		11		2.5		18		20		11		9.375		7		18.75
26	Baseline	45	Male	13	37	0	1	0	0	0	0	1	0	60	52.2		-7		-11.6667	11	7	7	7	4	-20	18		-2		-25		0		0		-2		-5		8		20		7		21.875		-3
26	Pre-Float 1	45	Male	13	37	0	1	0	0	0	0	1	0	60	52.2	42		36.6667		11	7	7	7	4	-20	18	5		50		0		0		12		5		19		22.5		10		6.25		8		25
26	Post-Float 1	45	Male	13	37	0	1	0	0	0	0	1	0	60	52.2	35		25		11	7	7	7	4	-20	18	3		25		0		0		10		0		27		42.5		17		28.125		5		6.25
27	Baseline	19	Male	13	23.6	1	1	0	0	0	1	0	1	60	50.1		-30		-50	49	17	19	22	1	-65	31		-1		-12.5		-2		-20		-20		-50		8		20		14		43.75		-3
27	Pre-Float 1	19	Male	13	23.6	1	1	0	0	0	1	0	1	60	50.1	63		71.6667		49	17	19	22	1	-65	31	6		62.5		2		20		35		62.5		18		20		10		6.25		11		43.75
27	Post-Float 1	19	Male	13	23.6	1	1	0	0	0	1	0	1	60	50.1	33		21.6667		49	17	19	22	1	-65	31	5		50		0		0		15		12.5		26		40		24		50		8		25
28	Baseline	48	Female	12	36.4	1	1	0	1	1	0	0	1	60	55.5		-22		-36.6667	36	11	19	29	1	-70	31		-3		-37.5		-3		-30		-7		-17.5		12		30		15		46.875		-5
28	Pre-Float 1	48	Female	12	36.4	1	1	0	1	1	0	0	1	60	55.5	53		55		36	11	19	29	1	-70	31	6		62.5		5		50		20		25		19		22.5		11		9.375		12		50
28	Post-Float 1	48	Female	12	36.4	1	1	0	1	1	0	0	1	60	55.5	31		18.3333		36	11	19	29	1	-70	31	3		25		2		20		13		7.5		31		52.5		26		56.25		7		18.75
29	Baseline	38	Female	16	31.2	0	1	1	0	0	0	0	1	60	31.5		-5		-8.33333	29	14	18	20	7	75	31		-2		-25		1		10		0		0		3		7.5		4		12.5		-7
29	Pre-Float 1	38	Female	16	31.2	0	1	1	0	0	0	0	1	60	31.5	32		20		29	14	18	20	7	75	31	4		37.5		0		0		11		2.5		26		40		17		28.125		11		43.75
29	Post-Float 1	38	Female	16	31.2	0	1	1	0	0	0	0	1	60	31.5	27		11.6667		29	14	18	20	7	75	31	2		12.5		1		10		11		2.5		29		47.5		21		40.625		4		0
30	Baseline	43	Female	8	39.9	0	1	0	0	0	0	1	0	60	0		-4		-6.66667	16	12	9	15	7	10	18		5		62.5		0		0		2		5		3		7.5		8		25		1
30	Pre-Float 1	43	Female	8	39.9	0	1	0	0	0	0	1	0	60	0	24		6.66667		16	12	9	15	7	10	18	1		0		0		0		12		5		39		72.5		27		59.375		6		12.5
30	Post-Float 1	43	Female	8	39.9	0	1	0	0	0	0	1	0	60	0	20		0		16	12	9	15	7	10	18	6		62.5		0		0		14		10		42		80		35		84.375		7		18.75
30.5	Baseline	29	Male	18	25.8	0	1	1	0	0	1	0	0	60	60		-14		-23.3333	28	7	1	4	5	0	16		-1		-12.5		0		0		-4		-10		11		27.5		7		21.875		0
30.8	Pre-Float 1	29	Male	18	25.8	0	1	1	0	0	1	0	0	60	60	37		28.3333		28	7	1	4	5	0	16	2		12.5		0		0		14		10		27		42.5		20		37.5		5		6.25
31.1	Post-Float 1	29	Male	18	25.8	0	1	1	0	0	1	0	0	60	60	23		5		28	7	1	4	5	0	16	1		0		0		0		10		0		38		70		27		59.375		5		6.25
32	Baseline	25	Female	16	23.4	0	1	0	0	0	0	1	0	60	0		-3		-5	27	2	5	4	6	5	17		-3		-37.5		-2		-20		-1		-2.5		5		12.5		0		0		-11
32	Pre-Float 1	25	Female	16	23.4	0	1	0	0	0	0	1	0	60	0	25		8.33333		27	2	5	4	6	5	17	8		87.5		2		20		11		2.5		18		20		15		21.875		20		100
32	Post-Float 1	25	Female	16	23.4	0	1	0	0	0	0	1	0	60	0	22		3.33333		27	2	5	4	6	5	17	5		50		0		0		10		0		23		32.5		15		21.875		9		31.25
33	Baseline	26	Female	14	33	1	1	0	0	0	1	0	1	60	59.9		-23		-38.3333	48	11	8	15	5	0	28		-3		-37.5		0		0		-11		-27.5		4		10		3		9.375		-5
33	Pre-Float 1	26	Female	14	33	1	1	0	0	0	1	0	1	60	59.9	51		51.6667		48	11	8	15	5	0	28	7		75		7		70		21		27.5		20		25		12		12.5		13		56.25
33	Post-Float 1	26	Female	14	33	1	1	0	0	0	1	0	1	60	59.9	28		13.3333		48	11	8	15	5	0	28	4		37.5		7		70		10		0		24		35		15		21.875		8		25
34	Baseline	27	Male	13	32.7	0	1	1	0	0	1	0	0	60	60		-16		-26.6667	13	7	7	4	4	0	27		0		0		0		0		-4		-10		0		0		2		6.25		0
34	Pre-Float 1	27	Male	13	32.7	0	1	1	0	0	1	0	0	60	60	39		31.6667		13	7	7	4	4	0	27	5		50		2		20		15		12.5		18		20		10		6.25		4		0
34	Post-Float 1	27	Male	13	32.7	0	1	1	0	0	1	0	0	60	60	23		5		13	7	7	4	4	0	27	5		50		2		20		11		2.5		18		20		12		12.5		4		0
35	Baseline	31	Female	14	31.6	1	1	1	0	0	0	1	1	21.6	0		-19		-31.6667	40	14	16	28	5	-10	32		-6		-75		-2		-20		-6		-15		18		45		19		59.375		-14
35	Pre-Float 1	31	Female	14	31.6	1	1	1	0	0	0	1	1	21.6	0	52		53.3333		40	14	16	28	5	-10	32	8		87.5		4		40		16		15		15		12.5		11		9.375		18		87.5
35	Post-Float 1	31	Female	14	31.6	1	1	1	0	0	0	1	1	21.6	0	33		21.6667		40	14	16	28	5	-10	32	2		12.5		2		20		10		0		33		57.5		30		68.75		4		0
36	Baseline	47	Female	16	32.6	0	1	1	1	0	1	0	0	60	60		-15		-25	21	14	21	25	2	-50	35		0		0		-1		-10		-5		-12.5		2		5		8		25		1
36	Pre-Float 1	47	Female	16	32.6	0	1	1	1	0	1	0	0	60	60	40		33.3333		21	14	21	25	2	-50	35	5		50		2		20		15		12.5		28		45		20		37.5		7		18.75
36	Post-Float 1	47	Female	16	32.6	0	1	1	1	0	1	0	0	60	60	25		8.33333		21	14	21	25	2	-50	35	5		50		1		10		10		0		30		50		28		62.5		8		25
37	Baseline	35	Male	14	28.2	0	1	0	0	0	1	0	1	60	0		-11		-18.3333	21	6	6	17	7	10	26		-3		-37.5		-3		-30		-6		-15		2		5		2		6.25		0
37	Pre-Float 1	35	Male	14	28.2	0	1	0	0	0	1	0	1	60	0	43		38.3333		21	6	6	17	7	10	26	6		62.5		5		50		16		15		28		45		20		37.5		8		25
37	Post-Float 1	35	Male	14	28.2	0	1	0	0	0	1	0	1	60	0	32		20		21	6	6	17	7	10	26	3		25		2		20		10		0		30		50		22		43.75		8		25
38	Baseline	49	Female	13	26.5	0	1	0	0	0	0	1	1	60	0		-7		-11.6667	21	9	3	14	6	0	22		-1		-12.5		-1		-10		0		0		-3		-7.5		0		0		1
38	Pre-Float 1	49	Female	13	26.5	0	1	0	0	0	0	1	1	60	0	30		16.6667		21	9	3	14	6	0	22	7		75		2		20		10		0		25		37.5		17		28.125		9		31.25
38	Post-Float 1	49	Female	13	26.5	0	1	0	0	0	0	1	1	60	0	23		5		21	9	3	14	6	0	22	6		62.5		1		10		10		0		22		30		17		28.125		10		37.5
39	Baseline	38	Female	13	22.5	0	1	0	0	0	0	1	0	60	60		-7		-11.6667	17	9	9	9	4	-20	20		-4		-50		-2		-20		-5		-12.5		4		10		13		40.625		-6
39	Pre-Float 1	38	Female	13	22.5	0	1	0	0	0	0	1	0	60	60	35		25		17	9	9	9	4	-20	20	7		75		4		40		15		12.5		29		47.5		17		28.125		11		43.75
39	Post-Float 1	38	Female	13	22.5	0	1	0	0	0	0	1	0	60	60	28		13.3333		17	9	9	9	4	-20	20	3		25		2		20		10		0		33		57.5		30		68.75		5		6.25
40	Baseline	50	Female	12	21.1	1	0	1	0	0	0	0	1	60	43.5		-20		-33.3333	65	20	18	18	9		21		-3		-37.5		-3		-30		-12		-30		19		47.5		16		50		-8
40	Pre-Float 1	50	Female	12	21.1	1	0	1	0	0	0	0	1	60	43.5	40		33.3333		65	20	18	18	9		21	4		37.5		3		30		22		30		31		52.5		24		50		12		50
40	Post-Float 1	50	Female	12	21.1	1	0	1	0	0	0	0	1	60	43.5	20		0		65	20	18	18	9		21	1		0		0		0		10		0		50		100		40		100		4		0
41	Baseline	30	Female	12	19.2	0	1	0	0	0	0	1	0	60	0		-10		-16.6667	11	5	16	12	4	-20	23		-4		-50		-2		-20		2		5		16		40		14		43.75		-5
41	Pre-Float 1	30	Female	12	19.2	0	1	0	0	0	0	1	0	60	0	38		30		11	5	16	12	4	-20	23	7		75		4		40		11		2.5		22		30		16		25		11		43.75
41	Post-Float 1	30	Female	12	19.2	0	1	0	0	0	0	1	0	60	0	28		13.3333		11	5	16	12	4	-20	23	3		25		2		20		13		7.5		38		70		30		68.75		6		12.5
42	Baseline	24	Female	14	30.9	1	1	0	0	0	0	1	1	60	36.5		-18		-30	44	14	18	21	2	-45	29		-4		-50		-3		-30		-9		-22.5		2		5		6		18.75		-6
42	Pre-Float 1	24	Female	14	30.9	1	1	0	0	0	0	1	1	60	36.5	62		70		44	14	18	21	2	-45	29	7		75		3		30		20		25		18		20		11		9.375		13		56.25
42	Post-Float 1	24	Female	14	30.9	1	1	0	0	0	0	1	1	60	36.5	44		40		44	14	18	21	2	-45	29	3		25		0		0		11		2.5		20		25		17		28.125		7		18.75
43	Baseline	42	Female	18	30.8	0	1	1	0	0	0	0	1	60	0		-16		-26.6667	10	13	11	10	4	-10	28		1		12.5		-2		-20		-2		-5		3		7.5		0		0		3
43	Pre-Float 1	42	Female	18	30.8	0	1	1	0	0	0	0	1	60	0	36		26.6667		10	13	11	10	4	-10	28	6		62.5		2		20		12		5		24		35		20		37.5		9		31.25
43	Post-Float 1	42	Female	18	30.8	0	1	1	0	0	0	0	1	60	0	20		0		10	13	11	10	4	-10	28	7		75		0		0		10		0		27		42.5		20		37.5		12		50
44	Baseline	32	Male	18	33	1	1	1	1	0	0	0	0	60	0		-15		-25	36	11	16	17	2	-45	28		-3		-37.5		-2		-20		-9		-22.5		11		27.5		11		34.375		-5
44	Pre-Float 1	32	Male	18	33	1	1	1	1	0	0	0	0	60	0	50		50		36	11	16	17	2	-45	28	7		75		6		60		19		22.5		20		25		13		15.625		11		43.75
44	Post-Float 1	32	Male	18	33	1	1	1	1	0	0	0	0	60	0	35		25		36	11	16	17	2	-45	28	4		37.5		4		40		10		0		31		52.5		24		50		6		12.5
45	Baseline	24	Female	14	36.6	1	1	0	1	0	0	0	1	60	6.33		-17		-28.3333	39	8	12	9	7	25	21		0		0		-2		-20		-1		-2.5		-3		-7.5		-2		-6.25		-2
45	Pre-Float 1	24	Female	14	36.6	1	1	0	1	0	0	0	1	60	6.33	51		51.6667		39	8	12	9	7	25	21	5		50		3		30		13		7.5		25		37.5		22		43.75		11		43.75
45	Post-Float 1	24	Female	14	36.6	1	1	0	1	0	0	0	1	60	6.33	34		23.3333		39	8	12	9	7	25	21	5		50		1		10		12		5		22		30		20		37.5		9		31.25
46	Baseline	30	Female	12	26.1	0	1	1	0	0	0	1	0	60	0.1		-14		-23.3333	4	0	1	0	8	10	19		-5		-62.5		-1		-10		0		0		21		52.5		15		46.875		-6
46	Pre-Float 1	30	Female	12	26.1	0	1	1	0	0	0	1	0	60	0.1	34		23.3333		4	0	1	0	8	10	19	6		62.5		3		30		14		10		29		47.5		25		53.125		10		37.5
46	Post-Float 1	30	Female	12	26.1	0	1	1	0	0	0	1	0	60	0.1	20		0		4	0	1	0	8	10	19	1		0		2		20		14		10		50		100		40		100		4		0
47	Baseline	20	Female	13	20	0	1	1	0	0	0	0	0	60	0.1		-5		-8.33333	4	1	0	0	8	60	20		-4		-50		-2		-20		0		0		8		20		5		15.625		-4
47	Pre-Float 1	20	Female	13	20	0	1	1	0	0	0	0	0	60	0.1	25		8.33333		4	1	0	0	8	60	20	6		62.5		2		20		10		0		34		60		30		68.75		8		25
47	Post-Float 1	20	Female	13	20	0	1	1	0	0	0	0	0	60	0.1	20		0		4	1	0	0	8	60	20	2		12.5		0		0		10		0		42		80		35		84.375		4		0
48	Baseline	35	Male	16	38.7	1	1	1	0	0	0	0	0	60	58		-18		-30	40	11	19	14	2	-10	35		-2		-25		-3		-30		-13		-32.5		12		30		12		37.5		-5
48	Pre-Float 1	35	Male	16	38.7	1	1	1	0	0	0	0	0	60	58	54		56.6667		40	11	19	14	2	-10	35	7		75		6		60		26		40		16		15		9		3.125		13		56.25
48	Post-Float 1	35	Male	16	38.7	1	1	1	0	0	0	0	0	60	58	36		26.6667		40	11	19	14	2	-10	35	5		50		3		30		13		7.5		28		45		21		40.625		8		25
49	Baseline	49	Female	18	29.8	0	1	0	0	0	1	0	0	60	58		-20		-33.3333	10	5	8	8	5	0	28		-1		-12.5		0		0		0		0		14		35		15		46.875		-3
49	Pre-Float 1	49	Female	18	29.8	0	1	0	0	0	1	0	0	60	58	46		43.3333		10	5	8	8	5	0	28	3		25		0		0		10		0		17		17.5		9		3.125		7		18.75
49	Post-Float 1	49	Female	18	29.8	0	1	0	0	0	1	0	0	60	58	26		10		10	5	8	8	5	0	28	2		12.5		0		0		10		0		31		52.5		24		50		4		0
50	Baseline	19	Female	13	20.7	1	0	1	0	0	1	0	0	60	0		-13		-21.6667	32	13	10	20	5	-10	30		0		0		-2		-20		0		0		2		5		2		6.25		0
50	Pre-Float 1	19	Female	13	20.7	1	0	1	0	0	1	0	0	60	0	37		28.3333		32	13	10	20	5	-10	30	6		62.5		2		20		11		2.5		22		30		17		28.125		11		43.75
50	Post-Float 1	19	Female	13	20.7	1	0	1	0	0	1	0	0	60	0	24		6.66667		32	13	10	20	5	-10	30	6		62.5		0		0		11		2.5		24		35		19		34.375		11		43.75
[truncated: 64 more columns]
